# Supplementary material
Source: PubMed Central journal article supplement (PMC3204201)
Supplement: Supp_Data.pdf [file Supp_Data.pdf]

## Supplementary Data

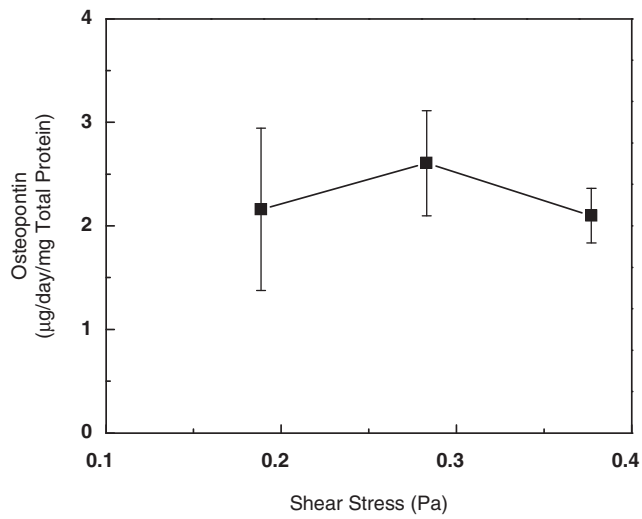

**SUPPLEMENTARY FIG. S1.** Differentiation cells on beads of diameter of 0.5 mm at different rotational speeds resulting in different shear stresses at day 7 (-■-).
